# Supplementary material
Source: PubMed Central journal article supplement (PMC3081884)

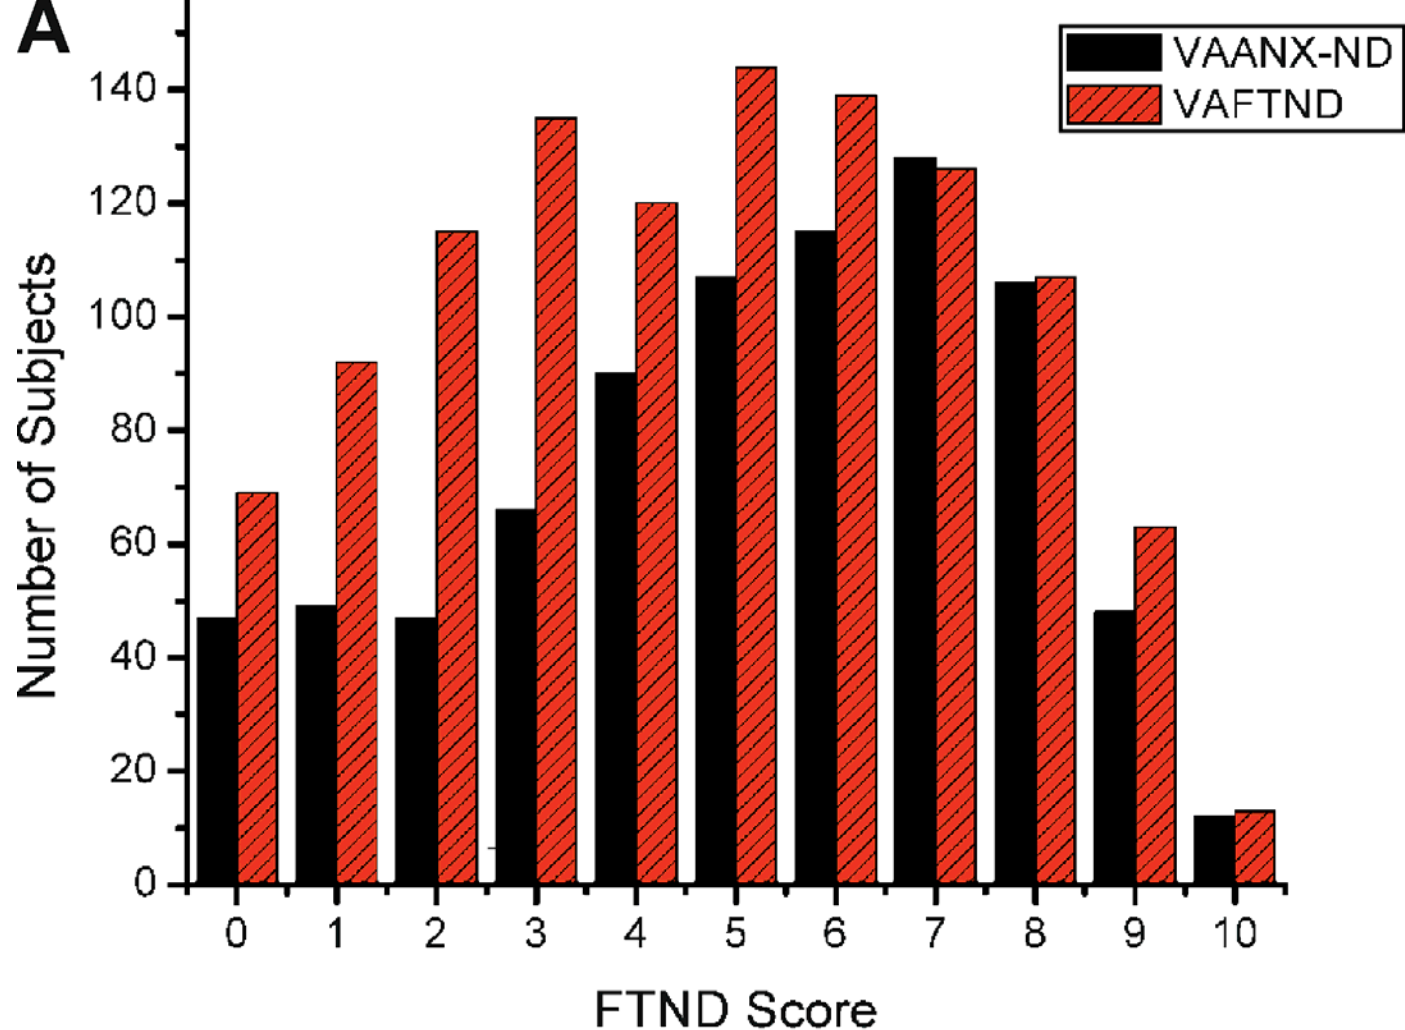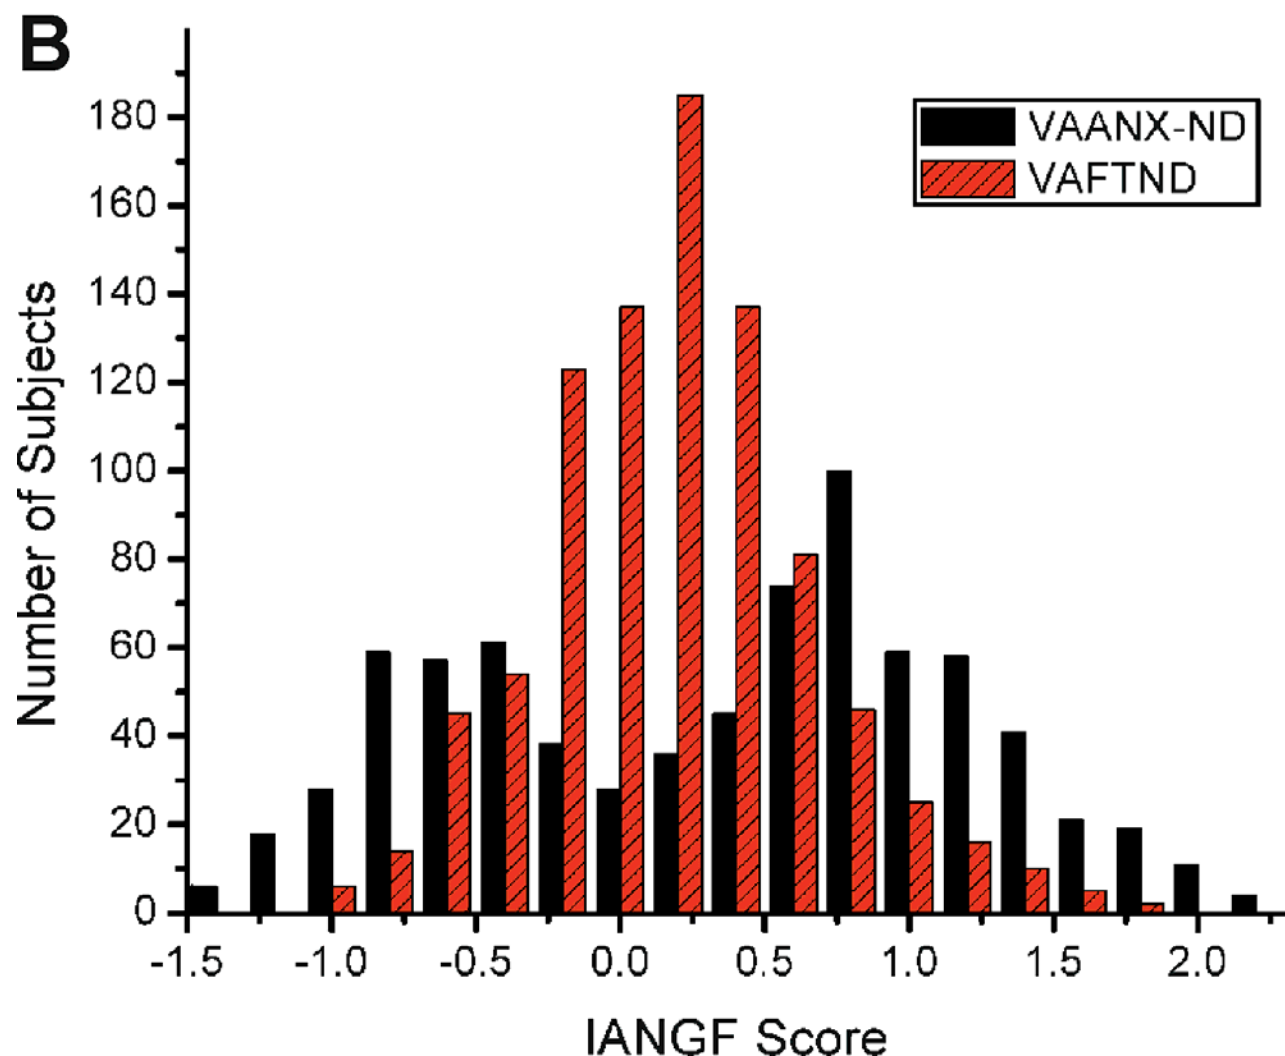

Supplement: NIHMS140553-supplement-figure_1.pdf [file NIHMS140553-supplement-figure_1.pdf]

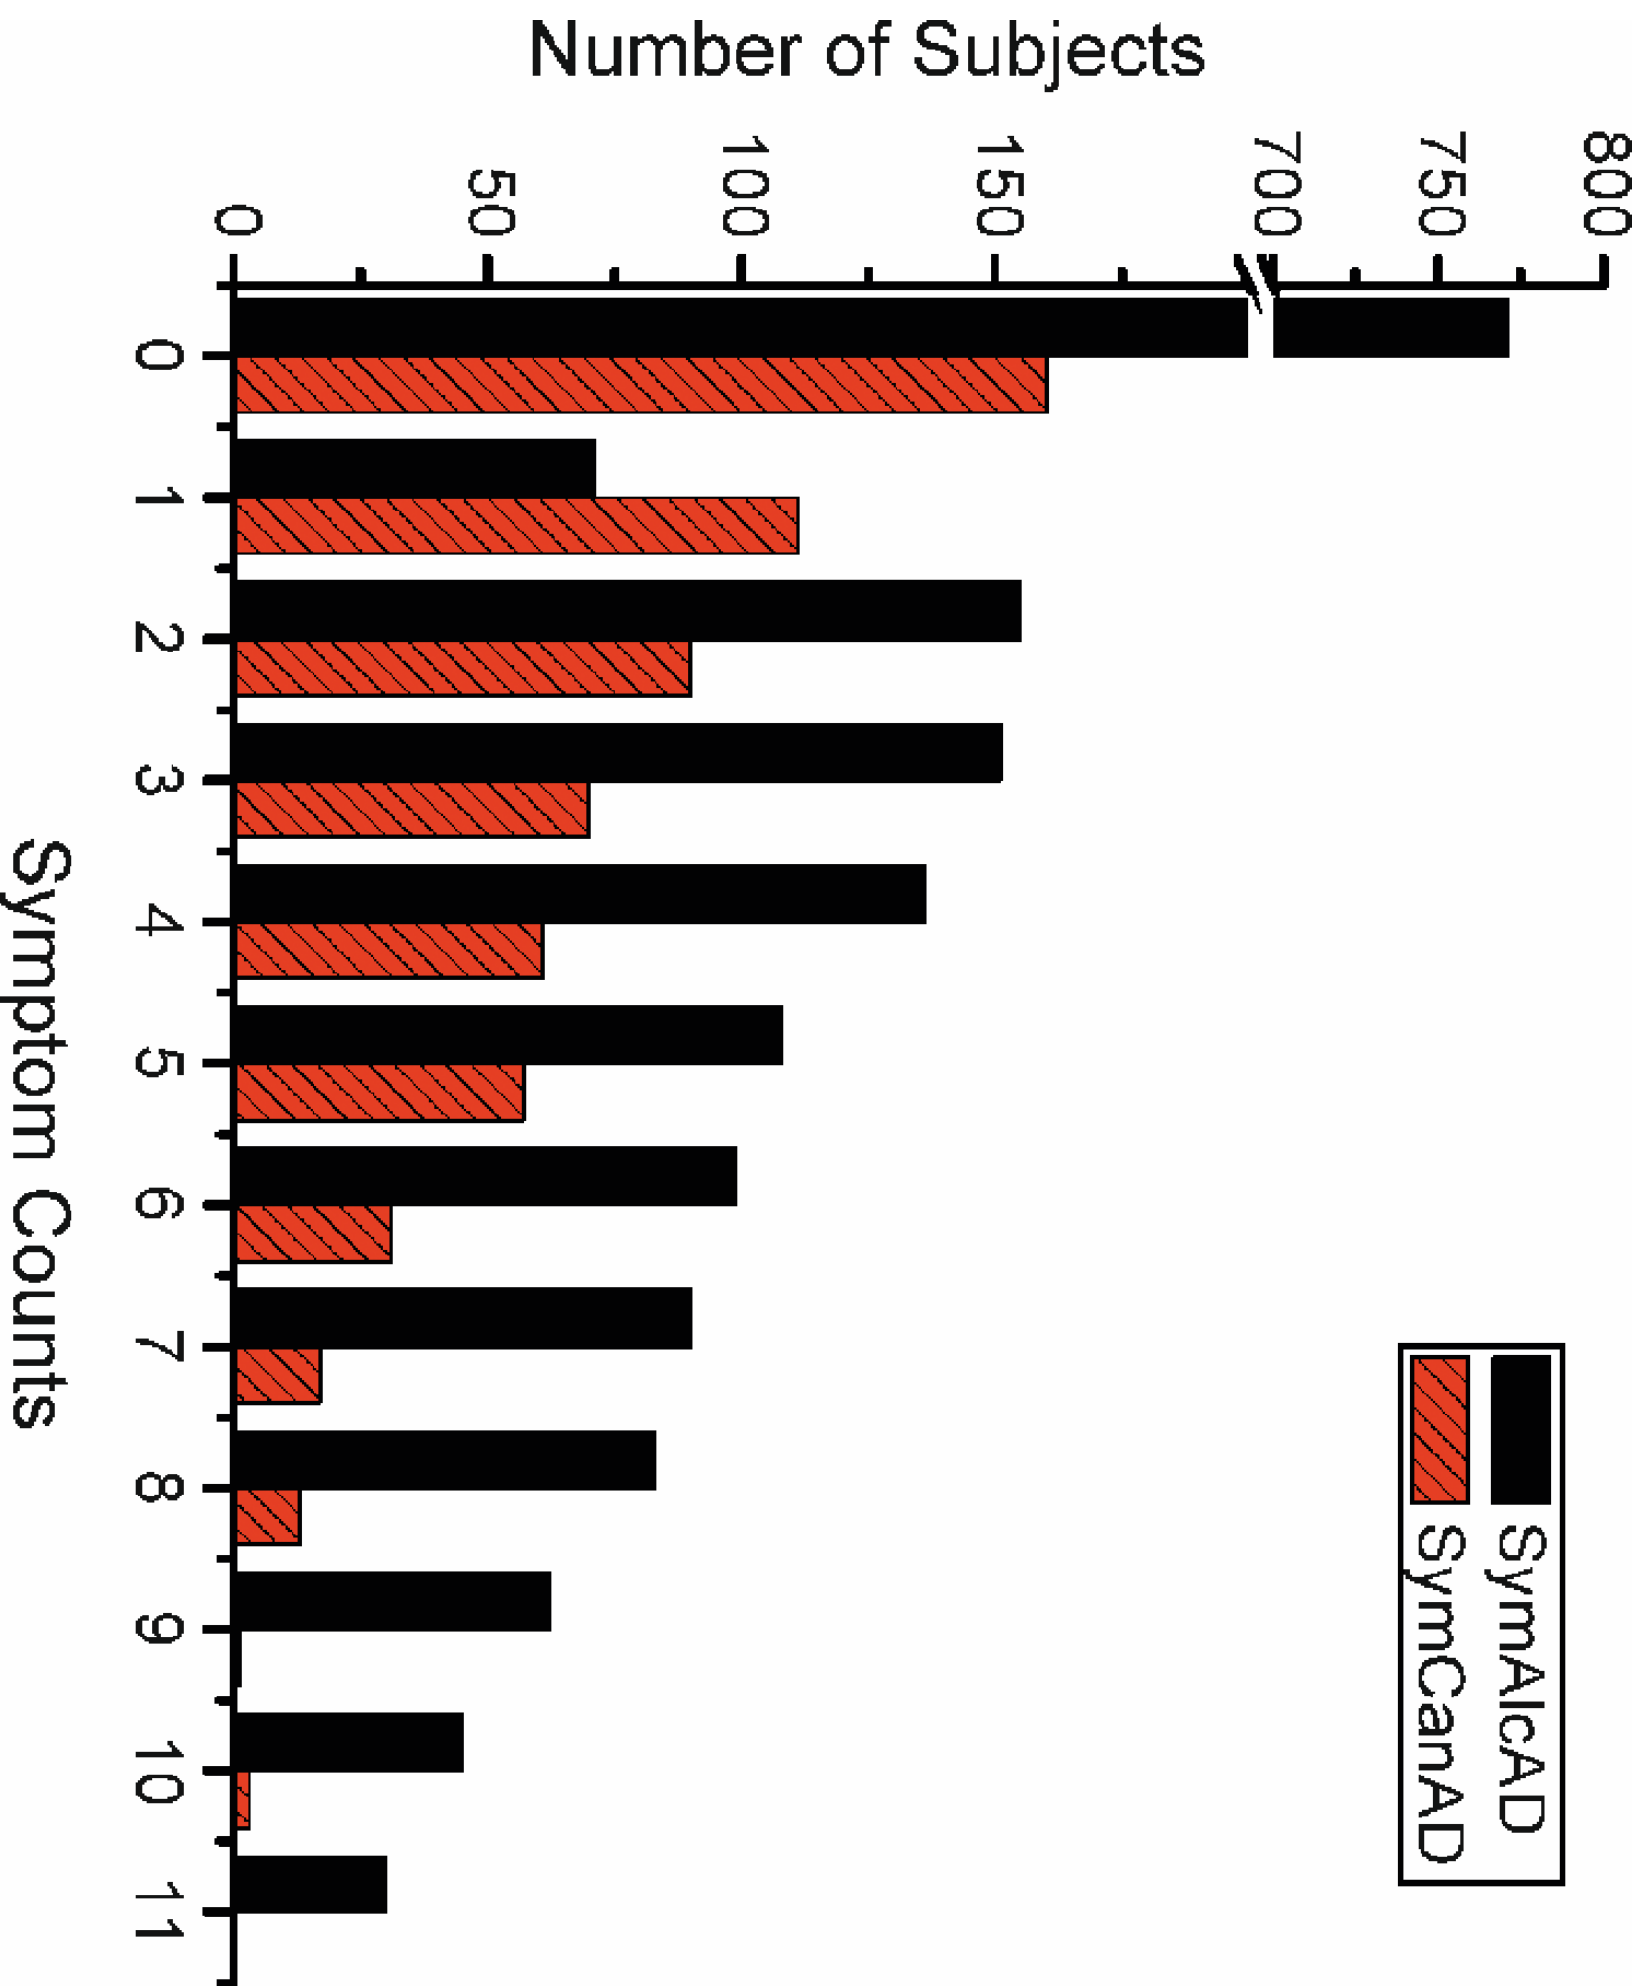

Supplement: NIHMS140553-supplement-figure_2.pdf [file NIHMS140553-supplement-figure_2.pdf]
